# Supplementary material
Source: PubMed Central journal article supplement (PMC2813164)
Supplement: SD4.pdf [file SD4.pdf]

SUPPLEMENTAL TABLE 1  
 Allele frequencies of 12 microsatellite markers in 425 *Plasmodium vivax* patient isolates from Sri Lanka, Myanmar, and Ethiopia\*

| Marker | Allele | Frequency | %      |      |
|--------|--------|-----------|--------|------|
| MS 1   | 201    | 2         | 0.47   |      |
|        | 204    | 7         | 1.65   |      |
|        | 207    | 11        | 2.59   |      |
|        | 210    | 4         | 0.94   |      |
|        | 213    | 7         | 1.65   |      |
|        | 216    | 4         | 0.94   |      |
|        | 219    | 15        | 3.53   |      |
|        | 222    | 32        | 7.53   |      |
|        | 225    | 26        | 6.12   |      |
|        | 228    | 42        | 9.88   |      |
|        | 231    | 39        | 9.18   |      |
|        | 234    | 33        | 7.76   |      |
|        | 237    | 25        | 5.88   |      |
|        | 240    | 18        | 4.24   |      |
|        | 243    | 42        | 9.88   |      |
|        | 246    | 111       | 26.12  |      |
|        | 249    | 7         | 1.65   |      |
|        | Total  | 425       | 100.00 |      |
|        | MS 2   | 182       | 5      | 1.18 |
|        |        | 186       | 9      | 2.12 |
| 190    |        | 9         | 2.12   |      |
| 194    |        | 33        | 7.76   |      |
| 198    |        | 74        | 17.41  |      |
| 202    |        | 22        | 5.18   |      |
| 206    |        | 23        | 5.41   |      |
| 210    |        | 109       | 25.65  |      |
| 214    |        | 65        | 15.29  |      |
| 218    |        | 20        | 4.71   |      |
| 222    |        | 8         | 1.88   |      |
| 226    |        | 6         | 1.41   |      |
| 230    |        | 5         | 1.18   |      |
| 234    |        | 5         | 1.18   |      |
| 238    |        | 11        | 2.59   |      |
| 242    |        | 1         | 0.24   |      |
| 246    |        | 5         | 1.18   |      |
| 254    |        | 8         | 1.88   |      |
| 258    |        | 1         | 0.24   |      |
| 262    |        | 2         | 0.47   |      |
| 270    | 3      | 0.71      |        |      |
| 286    | 1      | 0.24      |        |      |
| Total  | 425    | 100.00    |        |      |
| MS 3   | 152    | 24        | 5.65   |      |
|        | 158    | 2         | 0.47   |      |
|        | 161    | 17        | 4.00   |      |
|        | 164    | 29        | 6.82   |      |
|        | 167    | 31        | 7.29   |      |
|        | 170    | 115       | 27.06  |      |
|        | 173    | 10        | 2.35   |      |
|        | 176    | 17        | 4.00   |      |
|        | 179    | 12        | 2.82   |      |
|        | 182    | 39        | 9.18   |      |
|        | 185    | 62        | 14.59  |      |
|        | 188    | 6         | 1.41   |      |
|        | 191    | 21        | 4.94   |      |
|        | 194    | 23        | 5.41   |      |
|        | 197    | 13        | 3.06   |      |
|        | 200    | 4         | 0.94   |      |
|        | Total  | 425       | 100.00 |      |
|        | MS 4   | 171       | 1      | 0.24 |
|        |        | 177       | 15     | 3.53 |
|        |        | 180       | 4      | 0.94 |
| 183    |        | 2         | 0.47   |      |
| 186    |        | 7         | 1.65   |      |
| 189    |        | 24        | 5.65   |      |
| 192    |        | 87        | 20.47  |      |
| 195    |        | 93        | 21.88  |      |

(continued)

SUPPLEMENTAL TABLE 1  
 Continued

| Marker | Allele | Frequency | %      |      |
|--------|--------|-----------|--------|------|
| MS 5   | 198    | 137       | 32.24  |      |
|        | 201    | 14        | 3.29   |      |
|        | 204    | 9         | 2.12   |      |
|        | 207    | 3         | 0.71   |      |
|        | 210    | 9         | 2.12   |      |
|        | 213    | 1         | 0.24   |      |
|        | 216    | 1         | 0.24   |      |
|        | 219    | 6         | 1.41   |      |
|        | 222    | 4         | 0.94   |      |
|        | 225    | 6         | 1.41   |      |
|        | 228    | 2         | 0.47   |      |
|        | Total  | 425       | 100.00 |      |
|        | MS 7   | 139       | 4      | 0.94 |
|        |        | 142       | 2      | 0.47 |
|        |        | 151       | 3      | 0.71 |
| 154    |        | 10        | 2.35   |      |
| 157    |        | 12        | 2.82   |      |
| 160    |        | 1         | 0.24   |      |
| 163    |        | 100       | 23.53  |      |
| 166    |        | 84        | 19.76  |      |
| 169    |        | 88        | 20.71  |      |
| 172    |        | 90        | 21.18  |      |
| 175    |        | 1         | 0.24   |      |
| 178    |        | 5         | 1.18   |      |
| 181    |        | 7         | 1.65   |      |
| 184    |        | 3         | 0.71   |      |
| 190    |        | 6         | 1.41   |      |
| 196    | 2      | 0.47      |        |      |
| 199    | 2      | 0.47      |        |      |
| 211    | 1      | 0.24      |        |      |
| 220    | 1      | 0.24      |        |      |
| 226    | 1      | 0.24      |        |      |
| 229    | 1      | 0.24      |        |      |
| 232    | 1      | 0.24      |        |      |
| Total  | 425    | 100.00    |        |      |
| MS 8   | 124    | 6         | 1.41   |      |
|        | 127    | 31        | 7.29   |      |
|        | 130    | 3         | 0.71   |      |
|        | 133    | 61        | 14.35  |      |
|        | 136    | 14        | 3.29   |      |
|        | 139    | 115       | 27.06  |      |
|        | 142    | 12        | 2.82   |      |
|        | 145    | 92        | 21.65  |      |
|        | 148    | 32        | 7.53   |      |
|        | 151    | 8         | 1.88   |      |
|        | 154    | 13        | 3.06   |      |
|        | 157    | 9         | 2.12   |      |
|        | 160    | 4         | 0.94   |      |
|        | 163    | 8         | 1.88   |      |
|        | 166    | 4         | 0.94   |      |
| 169    | 8      | 1.88      |        |      |
| 172    | 3      | 0.71      |        |      |
| 175    | 1      | 0.24      |        |      |
| 178    | 1      | 0.24      |        |      |
| Total  | 425    | 100.00    |        |      |
| MS 8   | 165    | 22        | 5.18   |      |
|        | 168    | 16        | 3.76   |      |
|        | 171    | 6         | 1.41   |      |
|        | 174    | 9         | 2.12   |      |
|        | 177    | 9         | 2.12   |      |
|        | 183    | 24        | 5.65   |      |
|        | 186    | 12        | 2.82   |      |
|        | 192    | 21        | 4.94   |      |
|        | 195    | 6         | 1.41   |      |
|        | 198    | 6         | 1.41   |      |
| 201    | 11     | 2.59      |        |      |
| 204    | 9      | 2.12      |        |      |

(continued)

SUPPLEMENTAL TABLE 1

Continued

| Marker | Allele | Frequency | %      |
|--------|--------|-----------|--------|
|        | 207    | 8         | 1.88   |
|        | 210    | 22        | 5.18   |
|        | 216    | 13        | 3.06   |
|        | 219    | 10        | 2.35   |
|        | 225    | 34        | 8.00   |
|        | 228    | 28        | 6.59   |
|        | 231    | 10        | 2.35   |
|        | 234    | 10        | 2.35   |
|        | 237    | 11        | 2.59   |
|        | 240    | 5         | 1.18   |
|        | 246    | 3         | 0.71   |
|        | 249    | 1         | 0.24   |
|        | 252    | 10        | 2.35   |
|        | 258    | 14        | 3.29   |
|        | 261    | 8         | 1.88   |
|        | 264    | 1         | 0.24   |
|        | 267    | 3         | 0.71   |
|        | 270    | 1         | 0.24   |
|        | 273    | 4         | 0.94   |
|        | 279    | 17        | 4.00   |
|        | 282    | 14        | 3.29   |
|        | 285    | 2         | 0.47   |
|        | 291    | 3         | 0.71   |
|        | 294    | 3         | 0.71   |
|        | 297    | 5         | 1.18   |
|        | 300    | 2         | 0.47   |
|        | 303    | 4         | 0.94   |
|        | 306    | 1         | 0.24   |
|        | 309    | 3         | 0.71   |
|        | 312    | 2         | 0.47   |
|        | 315    | 1         | 0.24   |
|        | 318    | 4         | 0.94   |
|        | 321    | 1         | 0.24   |
|        | 324    | 11        | 2.59   |
|        | 333    | 1         | 0.24   |
|        | 339    | 2         | 0.47   |
|        | 342    | 1         | 0.24   |
|        | 345    | 1         | 0.24   |
|        | Total  | 425       | 100.00 |
| MS 10  | 174    | 4         | 0.94   |
|        | 177    | 88        | 20.71  |
|        | 180    | 8         | 1.88   |
|        | 183    | 32        | 7.53   |
|        | 186    | 1         | 0.24   |
|        | 189    | 14        | 3.29   |
|        | 192    | 3         | 0.71   |
|        | 195    | 21        | 4.94   |
|        | 198    | 27        | 6.35   |
|        | 201    | 24        | 5.65   |
|        | 204    | 40        | 9.41   |
|        | 207    | 14        | 3.29   |
|        | 210    | 17        | 4.00   |
|        | 213    | 42        | 9.88   |
|        | 216    | 22        | 5.18   |
|        | 219    | 6         | 1.41   |
|        | 222    | 8         | 1.88   |
|        | 225    | 18        | 4.24   |
|        | 231    | 13        | 3.06   |
|        | 234    | 2         | 0.47   |
|        | 237    | 9         | 2.12   |
|        | 240    | 4         | 0.94   |
|        | 243    | 5         | 1.18   |
|        | 249    | 3         | 0.71   |
|        | Total  | 425       | 100.00 |
| MS 12  | 191    | 4         | 0.94   |
|        | 194    | 27        | 6.35   |
|        | 197    | 40        | 9.41   |
|        | 200    | 11        | 2.59   |
|        | 203    | 29        | 6.82   |

(continued)

SUPPLEMENTAL TABLE 1

Continued

| Marker | Allele | Frequency | %      |
|--------|--------|-----------|--------|
|        | 206    | 28        | 6.59   |
|        | 209    | 11        | 2.59   |
|        | 212    | 37        | 8.71   |
|        | 215    | 25        | 5.88   |
|        | 218    | 15        | 3.53   |
|        | 221    | 17        | 4.00   |
|        | 224    | 30        | 7.06   |
|        | 227    | 60        | 14.12  |
|        | 230    | 11        | 2.59   |
|        | 233    | 4         | 0.94   |
|        | 236    | 5         | 1.18   |
|        | 239    | 4         | 0.94   |
|        | 242    | 28        | 6.59   |
|        | 245    | 11        | 2.59   |
|        | 248    | 6         | 1.41   |
|        | 251    | 8         | 1.88   |
|        | 254    | 2         | 0.47   |
|        | 257    | 8         | 1.88   |
|        | 260    | 3         | 0.71   |
|        | 263    | 1         | 0.24   |
|        | Total  | 425       | 100.00 |
| MS 15  | 236    | 14        | 3.29   |
|        | 239    | 28        | 6.59   |
|        | 242    | 51        | 12.00  |
|        | 245    | 51        | 12.00  |
|        | 248    | 39        | 9.18   |
|        | 251    | 74        | 17.41  |
|        | 254    | 25        | 5.88   |
|        | 257    | 66        | 15.53  |
|        | 260    | 76        | 17.88  |
|        | 263    | 1         | 0.24   |
|        | Total  | 425       | 100.00 |
| MS 16  | 132    | 5         | 1.18   |
|        | 138    | 4         | 0.94   |
|        | 144    | 5         | 1.18   |
|        | 147    | 312       | 73.41  |
|        | 150    | 14        | 3.29   |
|        | 153    | 45        | 10.59  |
|        | 159    | 5         | 1.18   |
|        | 162    | 4         | 0.94   |
|        | 168    | 2         | 0.47   |
|        | 171    | 2         | 0.47   |
|        | 174    | 3         | 0.71   |
|        | 177    | 2         | 0.47   |
|        | 192    | 1         | 0.24   |
|        | 210    | 1         | 0.24   |
|        | 219    | 3         | 0.71   |
|        | 225    | 1         | 0.24   |
|        | 231    | 2         | 0.47   |
|        | 234    | 1         | 0.24   |
|        | 240    | 1         | 0.24   |
|        | 264    | 1         | 0.24   |
|        | 285    | 1         | 0.24   |
|        | 288    | 1         | 0.24   |
|        | 291    | 1         | 0.24   |
|        | 294    | 1         | 0.24   |
|        | 330    | 7         | 1.65   |
|        | Total  | 425       | 100.00 |
| MS 20  | 150    | 4         | 0.94   |
|        | 153    | 10        | 2.35   |
|        | 156    | 90        | 21.18  |
|        | 159    | 6         | 1.41   |
|        | 162    | 3         | 0.71   |
|        | 165    | 1         | 0.24   |
|        | 168    | 12        | 2.82   |
|        | 171    | 12        | 2.82   |
|        | 174    | 37        | 8.71   |
|        | 177    | 8         | 1.88   |
|        | 180    | 10        | 2.35   |

(continued)

SUPPLEMENTAL TABLE 1  
Continued

| Marker | Allele | Frequency | %      |
|--------|--------|-----------|--------|
|        | 183    | 7         | 1.65   |
|        | 186    | 19        | 4.47   |
|        | 189    | 4         | 0.94   |
|        | 192    | 5         | 1.18   |
|        | 195    | 18        | 4.24   |
|        | 198    | 5         | 1.18   |
|        | 201    | 9         | 2.12   |
|        | 204    | 13        | 3.06   |
|        | 207    | 15        | 3.53   |
|        | 210    | 17        | 4.00   |
|        | 213    | 14        | 3.29   |
|        | 216    | 8         | 1.88   |
|        | 219    | 4         | 0.94   |
|        | 222    | 11        | 2.59   |
|        | 225    | 11        | 2.59   |
|        | 228    | 17        | 4.00   |
|        | 231    | 8         | 1.88   |
|        | 234    | 3         | 0.71   |
|        | 237    | 1         | 0.24   |
|        | 240    | 30        | 7.06   |
|        | 243    | 5         | 1.18   |
|        | 246    | 8         | 1.88   |
|        | Total  | 425       | 100.00 |

\*Allele sizes are in basepairs.

Proof only

SUPPLEMENTAL TABLE 2  
Allele frequencies of 12 microsatellite markers of *Plasmodium vivax* patient isolates from  
Sri Lanka (n = 140), Myanmar (n = 167), and Ethiopia (n = 118)\*

| Marker | Sri Lanka |           |        | Myanmar |           |        | Ethiopia |           |        |
|--------|-----------|-----------|--------|---------|-----------|--------|----------|-----------|--------|
|        | Allele    | Frequency | %      | Allele  | Frequency | %      | Allele   | Frequency | %      |
| MS 1   | 201       | 1         | 0.71   | 201     | 1         | 0.60   | 207      | 3         | 2.54   |
|        | 204       | 2         | 1.43   | 204     | 5         | 2.99   | 213      | 3         | 2.54   |
|        | 207       | 1         | 0.71   | 207     | 7         | 4.19   | 216      | 1         | 0.85   |
|        | 210       | 2         | 1.43   | 210     | 2         | 1.20   | 219      | 6         | 5.08   |
|        | 213       | 2         | 1.43   | 213     | 2         | 1.20   | 222      | 4         | 3.39   |
|        | 219       | 3         | 2.14   | 216     | 3         | 1.80   | 225      | 2         | 1.69   |
|        | 222       | 19        | 13.57  | 219     | 6         | 3.59   | 228      | 5         | 4.24   |
|        | 225       | 7         | 5.00   | 222     | 9         | 5.39   | 231      | 10        | 8.47   |
|        | 228       | 17        | 12.14  | 225     | 17        | 10.18  | 234      | 11        | 9.32   |
|        | 231       | 12        | 8.57   | 228     | 20        | 11.98  | 237      | 11        | 9.32   |
|        | 234       | 16        | 11.43  | 231     | 17        | 10.18  | 240      | 2         | 1.69   |
|        | 237       | 8         | 5.71   | 234     | 6         | 3.59   | 243      | 7         | 5.93   |
|        | 240       | 7         | 5.00   | 237     | 6         | 3.59   | 246      | 53        | 44.92  |
|        | 243       | 18        | 12.86  | 240     | 9         | 5.39   | Total    | 118       | 100.00 |
|        | 246       | 23        | 16.43  | 243     | 17        | 10.18  |          |           |        |
|        | 249       | 2         | 1.43   | 246     | 35        | 20.96  |          |           |        |
| Total  | 140       | 100.00    | 249    | 5       | 2.99      |        |          |           |        |
|        |           |           | Total  | 167     | 100.00    |        |          |           |        |
| MS 2   | 182       | 1         | 0.71   | 182     | 4         | 2.40   | 186      | 2         | 1.69   |
|        | 186       | 3         | 2.14   | 186     | 4         | 2.40   | 194      | 10        | 8.47   |
|        | 190       | 5         | 3.57   | 190     | 4         | 2.40   | 198      | 39        | 33.05  |
|        | 194       | 14        | 10.00  | 194     | 9         | 5.39   | 202      | 6         | 5.08   |
|        | 198       | 11        | 7.86   | 198     | 24        | 14.37  | 206      | 3         | 2.54   |
|        | 202       | 7         | 5.00   | 202     | 9         | 5.39   | 210      | 31        | 26.27  |
|        | 206       | 16        | 11.43  | 206     | 4         | 2.40   | 214      | 14        | 11.86  |
|        | 210       | 42        | 30.00  | 210     | 36        | 21.56  | 218      | 3         | 2.54   |
|        | 214       | 23        | 16.43  | 214     | 28        | 16.77  | 222      | 1         | 0.85   |
|        | 218       | 7         | 5.00   | 218     | 10        | 5.99   | 226      | 2         | 1.69   |
|        | 222       | 5         | 3.57   | 222     | 2         | 1.20   | 230      | 3         | 2.54   |
|        | 230       | 1         | 0.71   | 226     | 4         | 2.40   | 234      | 1         | 0.85   |
|        | 238       | 1         | 0.71   | 230     | 1         | 0.60   | 238      | 3         | 2.54   |
|        | 246       | 1         | 0.71   | 234     | 4         | 2.40   | Total    | 118       | 100.00 |
|        | 254       | 2         | 1.43   | 238     | 7         | 4.19   |          |           |        |
|        | 286       | 1         | 0.71   | 242     | 1         | 0.60   |          |           |        |
|        | Total     | 140       | 100.00 | 246     | 4         | 2.40   |          |           |        |
|        |           |           |        | 254     | 6         | 3.59   |          |           |        |
|        |           |           |        | 258     | 1         | 0.60   |          |           |        |
|        |           |           | 262    | 2       | 1.20      |        |          |           |        |
|        |           |           | 270    | 3       | 1.80      |        |          |           |        |
|        |           |           | Total  | 167     | 100.00    |        |          |           |        |
| MS 3   | 152       | 6         | 4.29   | 152     | 13        | 7.78   | 152      | 5         | 4.24   |
|        | 158       | 1         | 0.71   | 158     | 1         | 0.60   | 161      | 1         | 0.85   |
|        | 161       | 2         | 1.43   | 161     | 14        | 8.38   | 164      | 10        | 8.47   |
|        | 164       | 6         | 4.29   | 164     | 13        | 7.78   | 167      | 11        | 9.32   |
|        | 167       | 8         | 5.71   | 167     | 12        | 7.19   | 170      | 30        | 25.42  |
|        | 170       | 27        | 19.29  | 170     | 58        | 34.73  | 173      | 1         | 0.85   |
|        | 173       | 3         | 2.14   | 173     | 6         | 3.59   | 176      | 6         | 5.08   |
|        | 176       | 5         | 3.57   | 176     | 6         | 3.59   | 179      | 8         | 6.78   |
|        | 179       | 3         | 2.14   | 179     | 1         | 0.60   | 182      | 11        | 9.32   |
|        | 182       | 25        | 17.86  | 182     | 3         | 1.80   | 185      | 25        | 21.19  |
|        | 185       | 24        | 17.14  | 185     | 13        | 7.78   | 191      | 2         | 1.69   |
|        | 188       | 2         | 1.43   | 188     | 4         | 2.40   | 194      | 2         | 1.69   |
|        | 191       | 12        | 8.57   | 191     | 7         | 4.19   | 197      | 5         | 4.24   |
|        | 194       | 11        | 7.86   | 194     | 10        | 5.99   | 200      | 1         | 0.85   |
|        | 197       | 5         | 3.57   | 197     | 3         | 1.80   | Total    | 118       | 100.00 |
|        | Total     | 140       | 100.00 | 200     | 3         | 1.80   |          |           |        |
|        |           |           |        | Total   | 167       | 100.00 |          |           |        |
| MS 4   | 177       | 1         | 0.71   | 171     | 1         | 0.60   | 177      | 4         | 3.39   |
|        | 186       | 5         | 3.57   | 177     | 10        | 5.99   | 180      | 2         | 1.69   |
|        | 189       | 14        | 10.00  | 180     | 2         | 1.20   | 186      | 2         | 1.69   |
|        | 192       | 25        | 17.86  | 183     | 2         | 1.20   | 189      | 3         | 2.54   |
|        | 195       | 35        | 25.00  | 189     | 7         | 4.19   | 192      | 36        | 30.51  |
|        | 198       | 47        | 33.57  | 192     | 26        | 15.57  | 195      | 16        | 13.56  |
|        | 201       | 5         | 3.57   | 195     | 42        | 25.15  | 198      | 38        | 32.20  |
|        | 204       | 4         | 2.86   | 198     | 52        | 31.14  | 201      | 5         | 4.24   |
|        | 210       | 2         | 1.43   | 201     | 4         | 2.40   | 204      | 3         | 2.54   |

(continued)

SUPPLEMENTAL TABLE 2

Continued

| Marker | Sri Lanka |           |        | Myanmar |           |        | Ethiopia |           |        |
|--------|-----------|-----------|--------|---------|-----------|--------|----------|-----------|--------|
|        | Allele    | Frequency | %      | Allele  | Frequency | %      | Allele   | Frequency | %      |
|        | 219       | 1         | 0.71   | 204     | 2         | 1.20   | 210      | 2         | 1.69   |
|        | 222       | 1         | 0.71   | 207     | 3         | 1.80   | 219      | 4         | 3.39   |
|        | Total     | 140       | 100.00 | 210     | 5         | 2.99   | 222      | 1         | 0.85   |
|        |           |           |        | 213     | 1         | 0.60   | 225      | 1         | 0.85   |
|        |           |           |        | 216     | 1         | 0.60   | 228      | 1         | 0.85   |
|        |           |           |        | 219     | 1         | 0.60   | Total    | 118       | 100.00 |
|        |           |           |        | 222     | 2         | 1.20   |          |           |        |
|        |           |           |        | 225     | 5         | 2.99   |          |           |        |
|        |           |           |        | 228     | 1         | 0.60   |          |           |        |
|        |           |           |        | Total   | 167       | 100.00 |          |           |        |
| MS 5   | 139       | 3         | 2.14   | 139     | 1         | 0.60   | 157      | 5         | 4.24   |
|        | 142       | 2         | 1.43   | 151     | 2         | 1.20   | 163      | 48        | 40.68  |
|        | 151       | 1         | 0.71   | 154     | 3         | 1.80   | 166      | 7         | 5.93   |
|        | 154       | 7         | 5.00   | 157     | 5         | 2.99   | 169      | 49        | 41.53  |
|        | 157       | 2         | 1.43   | 163     | 19        | 11.38  | 172      | 8         | 6.78   |
|        | 160       | 1         | 0.71   | 166     | 31        | 18.56  | 199      | 1         | 0.85   |
|        | 163       | 33        | 23.57  | 169     | 25        | 14.97  | Total    | 118       | 100.00 |
|        | 166       | 46        | 32.86  | 172     | 62        | 37.13  |          |           |        |
|        | 169       | 14        | 10.00  | 175     | 1         | 0.60   |          |           |        |
|        | 172       | 20        | 14.29  | 178     | 5         | 2.99   |          |           |        |
|        | 181       | 5         | 3.57   | 181     | 2         | 1.20   |          |           |        |
|        | 190       | 1         | 0.71   | 184     | 3         | 1.80   |          |           |        |
|        | 196       | 1         | 0.71   | 190     | 5         | 2.99   |          |           |        |
|        | 211       | 1         | 0.71   | 196     | 1         | 0.60   |          |           |        |
|        | 226       | 1         | 0.71   | 199     | 1         | 0.60   |          |           |        |
|        | 229       | 1         | 0.71   | 220     | 1         | 0.60   |          |           |        |
|        | 232       | 1         | 0.71   | Total   | 167       | 100.00 |          |           |        |
|        | Total     | 140       | 100.00 |         |           |        |          |           |        |
| MS 7   | 127       | 8         | 5.71   | 124     | 6         | 3.59   | 127      | 7         | 5.93   |
|        | 130       | 1         | 0.71   | 127     | 16        | 9.58   | 133      | 9         | 7.63   |
|        | 133       | 30        | 21.43  | 130     | 2         | 1.20   | 136      | 2         | 1.69   |
|        | 136       | 10        | 7.14   | 133     | 22        | 13.17  | 139      | 59        | 50.00  |
|        | 139       | 27        | 19.29  | 136     | 2         | 1.20   | 145      | 36        | 30.51  |
|        | 142       | 4         | 2.86   | 139     | 29        | 17.37  | 154      | 2         | 1.69   |
|        | 145       | 32        | 22.86  | 142     | 8         | 4.79   | 157      | 1         | 0.85   |
|        | 148       | 11        | 7.86   | 145     | 24        | 14.37  | 169      | 1         | 0.85   |
|        | 151       | 6         | 4.29   | 148     | 21        | 12.57  | 175      | 1         | 0.85   |
|        | 154       | 2         | 1.43   | 151     | 2         | 1.20   | Total    | 118       | 100.00 |
|        | 157       | 1         | 0.71   | 154     | 9         | 5.39   |          |           |        |
|        | 160       | 2         | 1.43   | 157     | 7         | 4.19   |          |           |        |
|        | 163       | 2         | 1.43   | 160     | 2         | 1.20   |          |           |        |
|        | 166       | 1         | 0.71   | 163     | 6         | 3.59   |          |           |        |
|        | 169       | 1         | 0.71   | 166     | 3         | 1.80   |          |           |        |
|        | 172       | 1         | 0.71   | 169     | 6         | 3.59   |          |           |        |
|        | 178       | 1         | 0.71   | 172     | 2         | 1.20   |          |           |        |
|        | Total     | 140       | 100.00 | Total   | 167       | 100.00 |          |           |        |
| MS 8   | 165       | 8         | 5.71   | 165     | 6         | 3.59   | 165      | 8         | 6.78   |
|        | 168       | 5         | 3.57   | 168     | 6         | 3.59   | 168      | 5         | 4.24   |
|        | 174       | 3         | 2.14   | 171     | 4         | 2.40   | 171      | 2         | 1.69   |
|        | 177       | 5         | 3.57   | 174     | 1         | 0.60   | 174      | 5         | 4.24   |
|        | 183       | 6         | 4.29   | 177     | 3         | 1.80   | 177      | 1         | 0.85   |
|        | 186       | 6         | 4.29   | 183     | 5         | 2.99   | 183      | 13        | 11.02  |
|        | 192       | 8         | 5.71   | 186     | 5         | 2.99   | 186      | 1         | 0.85   |
|        | 195       | 1         | 0.71   | 192     | 8         | 4.79   | 192      | 5         | 4.24   |
|        | 198       | 2         | 1.43   | 195     | 3         | 1.80   | 195      | 2         | 1.69   |
|        | 201       | 5         | 3.57   | 198     | 2         | 1.20   | 198      | 2         | 1.69   |
|        | 204       | 1         | 0.71   | 201     | 4         | 2.40   | 201      | 2         | 1.69   |
|        | 207       | 2         | 1.43   | 204     | 5         | 2.99   | 204      | 3         | 2.54   |
|        | 210       | 6         | 4.29   | 207     | 4         | 2.40   | 207      | 2         | 1.69   |
|        | 216       | 4         | 2.86   | 210     | 11        | 6.59   | 210      | 5         | 4.24   |
|        | 219       | 7         | 5.00   | 216     | 8         | 4.79   | 216      | 1         | 0.85   |
|        | 225       | 6         | 4.29   | 219     | 2         | 1.20   | 219      | 1         | 0.85   |
|        | 228       | 9         | 6.43   | 225     | 14        | 8.38   | 225      | 14        | 11.86  |
|        | 231       | 2         | 1.43   | 228     | 12        | 7.19   | 228      | 7         | 5.93   |
|        | 234       | 1         | 0.71   | 231     | 6         | 3.59   | 231      | 2         | 1.69   |
|        | 237       | 4         | 2.86   | 234     | 7         | 4.19   | 234      | 2         | 1.69   |
|        | 240       | 2         | 1.43   | 237     | 4         | 2.40   | 237      | 3         | 2.54   |

(continued)

SUPPLEMENTAL TABLE 2  
Continued

| Marker | Sri Lanka |           |        | Myanmar |           |        | Ethiopia |           |        |
|--------|-----------|-----------|--------|---------|-----------|--------|----------|-----------|--------|
|        | Allele    | Frequency | %      | Allele  | Frequency | %      | Allele   | Frequency | %      |
|        | 246       | 1         | 0.71   | 240     | 2         | 1.20   | 240      | 1         | 0.85   |
|        | 249       | 1         | 0.71   | 246     | 1         | 0.60   | 246      | 1         | 0.85   |
|        | 252       | 3         | 2.14   | 252     | 6         | 3.59   | 252      | 1         | 0.85   |
|        | 258       | 2         | 1.43   | 258     | 9         | 5.39   | 258      | 3         | 2.54   |
|        | 261       | 2         | 1.43   | 261     | 2         | 1.20   | 261      | 4         | 3.39   |
|        | 264       | 1         | 0.71   | 267     | 1         | 0.60   | 267      | 1         | 0.85   |
|        | 267       | 1         | 0.71   | 273     | 1         | 0.60   | 273      | 1         | 0.85   |
|        | 270       | 1         | 0.71   | 279     | 4         | 2.40   | 279      | 9         | 7.63   |
|        | 273       | 2         | 1.43   | 282     | 3         | 1.80   | 282      | 4         | 3.39   |
|        | 279       | 4         | 2.86   | 285     | 1         | 0.60   | 285      | 1         | 0.85   |
|        | 282       | 7         | 5.00   | 291     | 1         | 0.60   | 291      | 1         | 0.85   |
|        | 291       | 1         | 0.71   | 294     | 1         | 0.60   | 300      | 1         | 0.85   |
|        | 294       | 2         | 1.43   | 297     | 1         | 0.60   | 309      | 1         | 0.85   |
|        | 297       | 4         | 2.86   | 300     | 1         | 0.60   | 312      | 1         | 0.85   |
|        | 303       | 1         | 0.71   | 303     | 3         | 1.80   | 318      | 1         | 0.85   |
|        | 306       | 1         | 0.71   | 309     | 2         | 1.20   | 324      | 1         | 0.85   |
|        | 315       | 1         | 0.71   | 312     | 1         | 0.60   | Total    | 118       | 100.00 |
|        | 318       | 2         | 1.43   | 318     | 1         | 0.60   |          |           |        |
|        | 324       | 8         | 5.71   | 321     | 1         | 0.60   |          |           |        |
|        | 339       | 1         | 0.71   | 324     | 2         | 1.20   |          |           |        |
|        | 345       | 1         | 0.71   | 333     | 1         | 0.60   |          |           |        |
|        | Total     | 140       | 100.00 | 339     | 1         | 0.60   |          |           |        |
|        |           |           |        | 342     | 1         | 0.60   |          |           |        |
|        |           |           |        | Total   | 167       | 100.00 |          |           |        |
| MS 10  | 177       | 35        | 25.00  | 174     | 4         | 2.40   | 177      | 13        | 11.02  |
|        | 180       | 4         | 2.86   | 177     | 40        | 23.95  | 180      | 2         | 1.69   |
|        | 183       | 14        | 10.00  | 180     | 2         | 1.20   | 183      | 7         | 5.93   |
|        | 189       | 2         | 1.43   | 183     | 11        | 6.59   | 189      | 4         | 3.39   |
|        | 195       | 9         | 6.43   | 186     | 1         | 0.60   | 192      | 1         | 0.85   |
|        | 198       | 5         | 3.57   | 189     | 8         | 4.79   | 195      | 5         | 4.24   |
|        | 201       | 6         | 4.29   | 192     | 2         | 1.20   | 198      | 5         | 4.24   |
|        | 204       | 9         | 6.43   | 195     | 7         | 4.19   | 201      | 13        | 11.02  |
|        | 207       | 4         | 2.86   | 198     | 17        | 10.18  | 204      | 22        | 18.64  |
|        | 210       | 11        | 7.86   | 201     | 5         | 2.99   | 207      | 6         | 5.08   |
|        | 213       | 15        | 10.71  | 204     | 9         | 5.39   | 210      | 3         | 2.54   |
|        | 216       | 5         | 3.57   | 207     | 4         | 2.40   | 213      | 20        | 16.95  |
|        | 219       | 2         | 1.43   | 210     | 3         | 1.80   | 216      | 6         | 5.08   |
|        | 222       | 4         | 2.86   | 213     | 7         | 4.19   | 219      | 2         | 1.69   |
|        | 225       | 7         | 5.00   | 216     | 11        | 6.59   | 222      | 3         | 2.54   |
|        | 231       | 3         | 2.14   | 219     | 2         | 1.20   | 225      | 3         | 2.54   |
|        | 234       | 2         | 1.43   | 222     | 1         | 0.60   | 231      | 2         | 1.69   |
|        | 240       | 2         | 1.43   | 225     | 8         | 4.79   | 237      | 1         | 0.85   |
|        | 243       | 1         | 0.71   | 231     | 8         | 4.79   | Total    | 118       | 100.00 |
|        | Total     | 140       | 100.00 | 237     | 8         | 4.79   |          |           |        |
|        |           |           |        | 240     | 2         | 1.20   |          |           |        |
|        |           |           |        | 243     | 4         | 2.40   |          |           |        |
|        |           |           |        | 249     | 3         | 1.80   |          |           |        |
|        |           |           |        | Total   | 167       | 100.00 |          |           |        |
| MS 12  | 194       | 4         | 2.86   | 191     | 4         | 2.40   | 194      | 13        | 11.02  |
|        | 197       | 8         | 5.71   | 194     | 10        | 5.99   | 197      | 9         | 7.63   |
|        | 200       | 5         | 3.57   | 197     | 23        | 13.77  | 200      | 1         | 0.85   |
|        | 203       | 7         | 5.00   | 200     | 5         | 2.99   | 203      | 8         | 6.78   |
|        | 206       | 14        | 10.00  | 203     | 14        | 8.38   | 206      | 9         | 7.63   |
|        | 209       | 6         | 4.29   | 206     | 5         | 2.99   | 209      | 2         | 1.69   |
|        | 212       | 11        | 7.86   | 209     | 3         | 1.80   | 212      | 11        | 9.32   |
|        | 215       | 6         | 4.29   | 212     | 15        | 8.98   | 215      | 10        | 8.47   |
|        | 218       | 7         | 5.00   | 215     | 9         | 5.39   | 218      | 3         | 2.54   |
|        | 221       | 10        | 7.14   | 218     | 5         | 2.99   | 221      | 3         | 2.54   |
|        | 224       | 20        | 14.29  | 221     | 4         | 2.40   | 224      | 6         | 5.08   |
|        | 227       | 16        | 11.43  | 224     | 4         | 2.40   | 227      | 28        | 23.73  |
|        | 230       | 5         | 3.57   | 227     | 16        | 9.58   | 233      | 3         | 2.54   |
|        | 233       | 1         | 0.71   | 230     | 6         | 3.59   | 236      | 1         | 0.85   |
|        | 242       | 9         | 6.43   | 236     | 4         | 2.40   | 242      | 7         | 5.93   |
|        | 245       | 5         | 3.57   | 239     | 4         | 2.40   | 245      | 1         | 0.85   |
|        | 248       | 1         | 0.71   | 242     | 12        | 7.19   | 248      | 1         | 0.85   |
|        | 251       | 1         | 0.71   | 245     | 5         | 2.99   | 251      | 1         | 0.85   |
|        | 257       | 3         | 2.14   | 248     | 4         | 2.40   | 254      | 1         | 0.85   |

(continued)

SUPPLEMENTAL TABLE 2

Continued

| Marker | Sri Lanka |           |        | Myanmar |           |        | Ethiopia |           |        |
|--------|-----------|-----------|--------|---------|-----------|--------|----------|-----------|--------|
|        | Allele    | Frequency | %      | Allele  | Frequency | %      | Allele   | Frequency | %      |
|        | 260       | 1         | 0.71   | 251     | 6         | 3.59   | Total    | 118       | 100.00 |
|        | Total     | 140       | 100.00 | 254     | 1         | 0.60   |          |           |        |
|        |           |           |        | 257     | 5         | 2.99   |          |           |        |
|        |           |           |        | 260     | 2         | 1.20   |          |           |        |
|        |           |           |        | 263     | 1         | 0.60   |          |           |        |
|        |           |           |        | Total   | 167       | 100.00 |          |           |        |
| MS 15  | 236       | 1         | 0.71   | 236     | 8         | 4.79   | 236      | 5         | 4.24   |
|        | 239       | 4         | 2.86   | 239     | 13        | 7.78   | 239      | 11        | 9.32   |
|        | 242       | 31        | 22.14  | 242     | 12        | 7.19   | 242      | 8         | 6.78   |
|        | 245       | 31        | 22.14  | 245     | 16        | 9.58   | 245      | 4         | 3.39   |
|        | 248       | 11        | 7.86   | 248     | 28        | 16.77  | 251      | 51        | 43.22  |
|        | 251       | 11        | 7.86   | 251     | 12        | 7.19   | 254      | 6         | 5.08   |
|        | 254       | 12        | 8.57   | 254     | 7         | 4.19   | 257      | 9         | 7.63   |
|        | 257       | 21        | 15.00  | 257     | 36        | 21.56  | 260      | 24        | 20.34  |
|        | 260       | 17        | 12.14  | 260     | 35        | 20.96  | Total    | 118       | 100.00 |
|        | 263       | 1         | 0.71   | Total   | 167       | 100.00 |          |           |        |
|        | Total     | 140       | 100.00 |         |           |        |          |           |        |
| MS 16  | 138       | 4         | 2.86   | 132     | 5         | 2.99   | 147      | 105       | 88.98  |
|        | 144       | 5         | 3.57   | 147     | 131       | 78.44  | 153      | 12        | 10.17  |
|        | 147       | 76        | 54.29  | 150     | 2         | 1.20   | 168      | 1         | 0.85   |
|        | 150       | 12        | 8.57   | 153     | 22        | 13.17  | Total    | 118       | 100.00 |
|        | 153       | 11        | 7.86   | 159     | 1         | 0.60   |          |           |        |
|        | 159       | 4         | 2.86   | 162     | 1         | 0.60   |          |           |        |
|        | 162       | 3         | 2.14   | 174     | 1         | 0.60   |          |           |        |
|        | 168       | 1         | 0.71   | 177     | 2         | 1.20   |          |           |        |
|        | 171       | 2         | 1.43   | 192     | 1         | 0.60   |          |           |        |
|        | 174       | 2         | 1.43   | 234     | 1         | 0.60   |          |           |        |
|        | 210       | 1         | 0.71   | Total   | 167       | 100.00 |          |           |        |
|        | 219       | 3         | 2.14   |         |           |        |          |           |        |
|        | 225       | 1         | 0.71   |         |           |        |          |           |        |
|        | 231       | 2         | 1.43   |         |           |        |          |           |        |
|        | 240       | 1         | 0.71   |         |           |        |          |           |        |
|        | 264       | 1         | 0.71   |         |           |        |          |           |        |
|        | 285       | 1         | 0.71   |         |           |        |          |           |        |
|        | 288       | 1         | 0.71   |         |           |        |          |           |        |
|        | 291       | 1         | 0.71   |         |           |        |          |           |        |
|        | 294       | 1         | 0.71   |         |           |        |          |           |        |
|        | 330       | 7         | 5.00   |         |           |        |          |           |        |
|        | Total     | 140       | 100.00 |         |           |        |          |           |        |
| MS 20  | 150       | 4         | 2.86   | 153     | 9         | 5.39   | 156      | 52        | 44.07  |
|        | 153       | 1         | 0.71   | 156     | 7         | 4.19   | 159      | 4         | 3.39   |
|        | 156       | 31        | 22.14  | 159     | 1         | 0.60   | 168      | 1         | 0.85   |
|        | 159       | 1         | 0.71   | 162     | 3         | 1.80   | 174      | 7         | 5.93   |
|        | 165       | 1         | 0.71   | 168     | 4         | 2.40   | 177      | 1         | 0.85   |
|        | 168       | 7         | 5.00   | 171     | 2         | 1.20   | 180      | 2         | 1.69   |
|        | 171       | 10        | 7.14   | 174     | 11        | 6.59   | 186      | 12        | 10.17  |
|        | 174       | 19        | 13.57  | 177     | 3         | 1.80   | 192      | 1         | 0.85   |
|        | 177       | 4         | 2.86   | 180     | 1         | 0.60   | 195      | 2         | 1.69   |
|        | 180       | 7         | 5.00   | 183     | 6         | 3.59   | 201      | 2         | 1.69   |
|        | 183       | 1         | 0.71   | 186     | 5         | 2.99   | 204      | 5         | 4.24   |
|        | 186       | 2         | 1.43   | 189     | 3         | 1.80   | 207      | 2         | 1.69   |
|        | 189       | 1         | 0.71   | 192     | 3         | 1.80   | 210      | 9         | 7.63   |
|        | 192       | 1         | 0.71   | 195     | 13        | 7.78   | 213      | 2         | 1.69   |
|        | 195       | 3         | 2.14   | 198     | 3         | 1.80   | 216      | 4         | 3.39   |
|        | 198       | 2         | 1.43   | 201     | 3         | 1.80   | 222      | 2         | 1.69   |
|        | 201       | 4         | 2.86   | 204     | 6         | 3.59   | 225      | 1         | 0.85   |
|        | 204       | 2         | 1.43   | 207     | 10        | 5.99   | 228      | 4         | 3.39   |
|        | 207       | 3         | 2.14   | 210     | 7         | 4.19   | 231      | 1         | 0.85   |
|        | 210       | 1         | 0.71   | 213     | 7         | 4.19   | 240      | 4         | 3.39   |
|        | 213       | 5         | 3.57   | 216     | 3         | 1.80   | Total    | 118       | 100.00 |
|        | 216       | 1         | 0.71   | 219     | 2         | 1.20   |          |           |        |
|        | 219       | 2         | 1.43   | 222     | 2         | 1.20   |          |           |        |
|        | 222       | 7         | 5.00   | 225     | 7         | 4.19   |          |           |        |
|        | 225       | 3         | 2.14   | 228     | 7         | 4.19   |          |           |        |
|        | 228       | 6         | 4.29   | 231     | 4         | 2.40   |          |           |        |
|        | 231       | 3         | 2.14   | 234     | 2         | 1.20   |          |           |        |
|        | 234       | 1         | 0.71   | 240     | 21        | 12.57  |          |           |        |

(continued)

SUPPLEMENTAL TABLE 2  
Continued

| Marker | Sri Lanka |           |        | Myanmar |           |        | Ethiopia |           |   |
|--------|-----------|-----------|--------|---------|-----------|--------|----------|-----------|---|
|        | Allele    | Frequency | %      | Allele  | Frequency | %      | Allele   | Frequency | % |
|        | 237       | 1         | 0.71   | 243     | 5         | 2.99   |          |           |   |
|        | 240       | 5         | 3.57   | 246     | 7         | 4.19   |          |           |   |
|        | 246       | 1         | 0.71   | Total   | 167       | 100.00 |          |           |   |
|        | Total     | 140       | 100.00 |         |           |        |          |           |   |

\*Allele sizes are in basepairs. Alleles private for Sri Lanka, Myanmar, and Ethiopia are shown in green, blue, and purple, respectively. Alleles private for Asia (common to Sri Lanka and Myanmar) are shown in red.

Proof only
